# Supplementary material
Source: PubMed Central journal article supplement (PMC8786210)
Supplement: NIHMS1766885-supplement-Supplementary_Tables_1-3.pdf [file NIHMS1766885-supplement-Supplementary_Tables_1-3.pdf]

**Comparative performance of risk prediction models for hepatitis B-related hepatocellular carcinoma in the United States**

Hyun-seok Kim, Xian Yu, Jennifer Kramer, Aaron P. Thrift, Pete Richardson, Yao-Chun Hsu, Avegail Flores, Hashem B El-Serag, Fasiha Kanwal

Table of contents

Table S1.....2

Table S2.....4

Table S3.....5

**Table S1. Summary of Hepatitis B virus-Hepatocellular Carcinoma prediction models**

| Risk score                        | Race              | Number | Cirrhosis (%) | Prior treatment | Medication               | Risk parameter                                      | Risk score cut-off                                            |
|-----------------------------------|-------------------|--------|---------------|-----------------|--------------------------|-----------------------------------------------------|---------------------------------------------------------------|
| REACH-B<br>Yang<br>2011           | Asian<br>(Taiwan) | 3,584  | 0%            | All naïve       | Not on Tx                | Age<br>Male<br>ALT<br>HBeAg<br>HBV DNA              | Low risk: <10<br>Intermediate risk: 10-12<br>High risk: >12   |
| PAGE-B<br>Papatheodoridis<br>2016 | Caucasian         | 1,350  | 20%           | 33%             | ETV/TDF                  | Age<br>Male<br>Platelet                             | Low risk: <10<br>Intermediate risk: 10-17<br>High risk: >17   |
| mPAGE-B<br>Kim<br>2018            | Asian<br>(Korea)  | 2,001  | 19.1%         | 39.5%           | ETV or TDF               | Age<br>Male<br>Platelet<br>Albumin                  | Low risk: ≤ 8<br>Intermediate risk: 9-12<br>High risk: ≥ 13:  |
| CU-HCC                            | Asian<br>(China)  | 1,005  | 38.1%         | NA              | Only 15.1%<br>were on Tx | Age<br>Albumin<br>Bilirubin<br>HBV DNA<br>Cirrhosis | Low risk: <5<br>Intermediate risk: 5-19<br>High risk: ≥ 19    |
| HCC-RESCUE<br>Sohn<br>2017        | Asian<br>(Korea)  | 990    | 39%           | All naïve       | ETV                      | Age<br>Male<br>Cirrhosis                            | Low risk: ≤ 64<br>Intermediate risk: 65-84<br>High risk: ≥ 85 |
| CAMD<br>Hsu<br>2019               | Asian<br>(Taiwan) | 23,851 | 26.4%         | NA              | ETV or TDF               | Age<br>Male<br>Diabetes<br>cirrhosis                | Low risk: <8<br>Intermediate risk: 8-13<br>High risk: >13     |
| APA-B<br>Chen                     | Asian<br>(Taiwan) | 883    | 35.9%         | All naïve       | ETV                      | Age<br>Platelet                                     | Low risk: ≤ 5<br>Intermediate risk: 6-9                       |

|                                                                                 |                      |       |       |           |                |                                                                        |                                                                       |
|---------------------------------------------------------------------------------|----------------------|-------|-------|-----------|----------------|------------------------------------------------------------------------|-----------------------------------------------------------------------|
| 2017                                                                            |                      |       |       |           |                | (12 months after ETV)<br>AFP (12 months after ETV)                     | High risk: $\geq 10$                                                  |
| REAL-B<br>Yang<br>2019                                                          | Asian-<br>Pacific    | 8,048 | 20.2% | 20%       | Any anti-viral | Age<br>Male<br>Alcohol use<br>Cirrhosis<br>Diabetes<br>Platelet<br>AFP | Low risk: $<4$<br>Intermediate risk: 4-7<br>High risk: 8-13           |
| AASL-HCC<br>Yu<br>2019                                                          | Asian<br>(Korea)     | 1,242 | 39.3% | All naïve | ETV or TDF     | Age<br>Male<br>Albumin<br>Cirrhosis                                    | Low risk: $\leq 5$<br>Intermediate risk: 6-19<br>High risk: $\geq 20$ |
| RWS-HCC<br>Poh<br>2016                                                          | Asian<br>(Singapore) | 538   | 14.9% | NA        | Any anti-viral | Age<br>Male<br>Cirrhosis<br>AFP                                        | Low risk: $<4.5$<br>High risk: $\geq 4.5$                             |
| Abbreviation: ETV: Entecavir, TDF: Tenofovir disoproxil, AFP: alpha-fetoprotein |                      |       |       |           |                |                                                                        |                                                                       |

**Table S2. ICD codes for key variables.**

| Variable                 | ICD9                                                                                                                                                                      | ICD10                                                                                                                                                                                                                                                                                                                                                                                                                                                                                            |
|--------------------------|---------------------------------------------------------------------------------------------------------------------------------------------------------------------------|--------------------------------------------------------------------------------------------------------------------------------------------------------------------------------------------------------------------------------------------------------------------------------------------------------------------------------------------------------------------------------------------------------------------------------------------------------------------------------------------------|
| Hepatocellular carcinoma | 155.0                                                                                                                                                                     | C22.0                                                                                                                                                                                                                                                                                                                                                                                                                                                                                            |
| Cirrhosis                | 456.1, 456.21, 456.0, 571.2, 571.5, 571.6, 789.5, 789.60, 789.59, 567.23, 572.2, 572.5, 573.5                                                                             | E83.110, G93.40, I85.00, I86.40, I85.10, I85.01, I86.41, I85.11, K65.2, K70.30, K70.31, K70.11, K71.91, K71.51, K71.7, K72.11, K74.60, K74.69, K74.3, K74.4, K74.5, K76.7, K76.81, R18.8                                                                                                                                                                                                                                                                                                         |
| Alcohol abuse            | 291.0, 291.1, 291.2, 291.3, 291.4, 291.5, 291.8X, 291.9, 303.00, 303.01, 303.02, 303.03, 303.90, 303.91, 303.92, 303.93, 305.0X, 357.5, 425.5, 535.3, 571.X, 790.3, V11.3 | F10.10, F10.11, F10.120, F10.121, F10.129, F10.14, F10.150, F10.151, F10.159, F10.18X, F10.19, F10.20, F10.21, F10.220, F10.221, F10.229, F10.230, F10.231, F10.232, F10.239, F10.24, F10.250, F10.251, F10.259, F10.26, F10.27, F10.280, F10.281, F10.282, F10.288, F10.29, F10.920, F10.921, F10.929, F10.94, F10.950, F10.951, F10.959, F10.96, F10.97, F10.980, F10.981, F10.982, F10.988, F10.99, G62.1, I42.6, K29.20, K29.21, K70.0, K70.10, K70.11, K70.2, K70.30, K70.31, K70.40, K70.9 |

**Table S3. Discrimination and calibration of ten HBV-HCC models for prediction of HCC risk using imputed dataset**

|            | Total Number | Number of HCC in 3 years | Number of HCC in 5 years | AUC                  |                      | Hosmer-Lemeshow $\chi^2$ |                  |
|------------|--------------|--------------------------|--------------------------|----------------------|----------------------|--------------------------|------------------|
|            |              |                          |                          | 3 year (95% CI)      | 5 year (95% CI)      | 3 year (p-value)         | 5 year (p-value) |
| REACH-B    | 3101         | 53                       | 83                       | 0.57<br>(0.49, 0.65) | 0.58<br>(0.51, 0.64) | 8.02<br>(0.33)           | 10.35<br>(0.17)  |
| PAGE-B     | 3101         | 53                       | 83                       | 0.73<br>(0.67, 0.79) | 0.73<br>(0.67, 0.79) | 5.25<br>(0.51)           | 5.01<br>(0.54)   |
| mPAGE-B    | 3101         | 53                       | 83                       | 0.74<br>(0.68, 0.80) | 0.74<br>(0.68, 0.80) | 12.68<br>(0.12)          | 11.65<br>(0.17)  |
| CU-HCC     | 3101         | 53                       | 83                       | 0.80<br>(0.76, 0.84) | 0.80<br>(0.78, 0.82) | 13.29<br>(0.07)          | 20.19<br>(<0.01) |
| HCC-RESCUE | 3101         | 53                       | 83                       | 0.79<br>(0.69, 0.89) | 0.77<br>(0.67, 0.87) | 7.54<br>(0.48)           | 11.19<br>(0.19)  |
| CAMD       | 3101         | 53                       | 83                       | 0.79<br>(0.73, 0.85) | 0.77<br>(0.73, 0.81) | 4.74<br>(0.69)           | 3.79<br>(0.80)   |
| APA-B*     | 3101         | 53                       | 83                       | 0.86<br>(0.76, 0.96) | 0.84<br>(0.80, 0.88) | 9.09<br>(0.11)           | 12.31<br>(0.03)  |
| REAL-B*    | 3101         | 53                       | 83                       | 0.83<br>(0.77, 0.89) | 0.81<br>(0.77, 0.85) | 2.20<br>(0.90)           | 9.60<br>(0.14)   |
| AASL-HCC   | 3101         | 53                       | 83                       | 0.86<br>(0.82, 0.90) | 0.86<br>(0.84, 0.88) | 13.63<br>(0.09)          | 29.61<br>(<0.01) |
| RWS-HCC*   | 3101         | 53                       | 83                       | 0.91<br>(0.87, 0.95) | 0.89<br>(0.87, 0.91) | 6.76<br>(0.34)           | 12.25<br>(0.06)  |

REACH-B= Risk estimation for hepatocellular carcinoma in chronic hepatitis B; mPAGE-B= modified PAGE-B; CU-HCC=Chinese University HCC; HCC-RESCUE=HCC-Risk Estimating Score in CHB patients Under Entecavir; CAMD= cirrhosis, age, male sex, and diabetes mellitus; APA-B=age, platelet, AFP; REAL-B= Real-World Effectiveness From the Asia Pacific Rim Liver Consortium for HBV Risk Score; AASL-HCC= age, albumin, sex, liver cirrhosis-HCC; RWS-HCC= Real-world risk score for hepatocellular carcinoma  
\*: highlights the models incorporating AFP variable
